# Supplementary material for: Effect of AOX1 and GAP transcriptional terminators on transcript levels of both the heterologous and the GAPDH genes and the extracellular Yp/x in GAP promoter-based Komagataella phaffii strains
Source: PeerJ journal article supplement (doi:10.7717/peerj.18181), 2024-09-26
Supplement: Table_S1.pdf [file Table_S1.pdf]

**Table S1** Oligonucleotides (primers) and probes.

| <b>Primer</b> | <b>Sequence</b>                   |
|---------------|-----------------------------------|
| T17AP         | GACTCGAGTCGACATCGAT <sub>17</sub> |
| RACEAP        | GACTCGAGTCGACATCG                 |
| 5qGAP         | GGAGACTACCTACGAGGAGATCAA          |
| FTE1          | CGCTGACAAGAACGGTTACA              |
| FTE2          | CTTGTGGGTGGAAACCAA                |
| 3TH           | GGTGCCGAGGATGACGATGA              |
| GAPF          | GTCCCTATTTCAATCAATTGAA            |
| 5ACT          | GCCCCAGAAGAGCACCCAGT              |
| 3ACT          | ACCGGAAGCGTACAGGGACA              |
| 5PTFTEII      | TCCAAATCACTGACGGTCCAGA            |
| 3PTFTEII      | TCACCGTCTTGAGCAACGAACA            |
| 5PTGAPDH      | TTCCATCTTCCACTGGTGCT              |
| 3PTGAPDH      | TTGGGACACGGAAAGCCAAA              |
| 5qYPT1        | GCGGTCAAGCTAGTGCTTCT              |
| 3qYPT1        | TGCTGACAAAACGTAAAACCA             |

  

| <b>Probe</b> | <b>Sequence</b>          |
|--------------|--------------------------|
| pFTEII       | TTTGGGTTTCGGTTTGGGTCCAGA |
| pGAPDH       | CCAGAATTGAACGGTAAGCTGA   |
